# Supplementary material
Source: Springer Nature journal article supplement (https://www.springermedizin.de/resource/supplementary/13033_2008_30_MOESM1_ESM.pdf/9651728)
Supplement: MOESM1 [file 9651728]

# BRAZZAVILLE

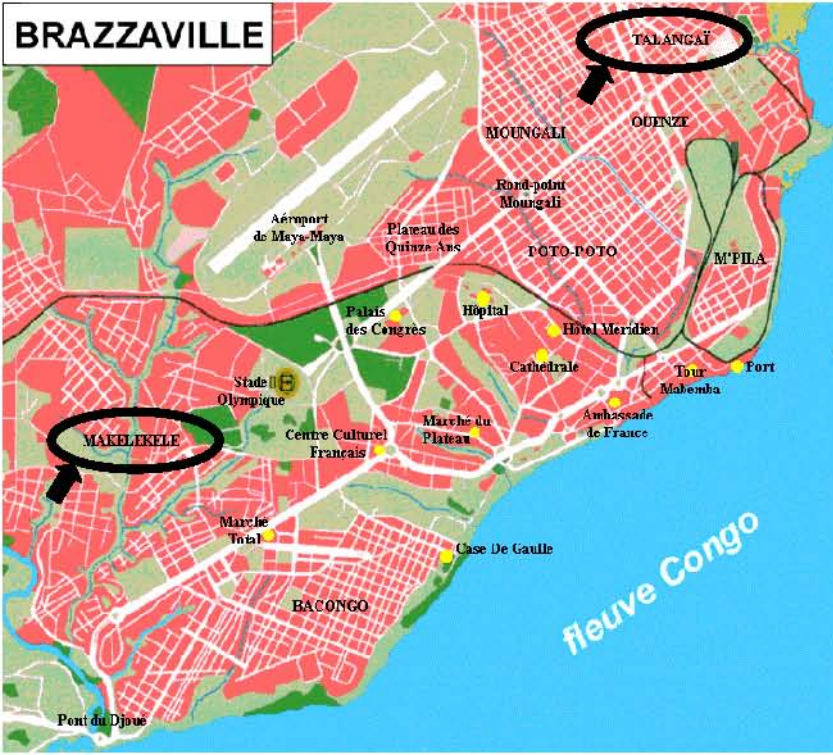

TALANGAI

MAKELEKELE

MOUNGALI

OUNZI

Aéroport  
de Maya-Maya

Plateau des  
Quinze Ans

Rond-point  
Moungali

FOTO-FOTO

M'PILA

Palais  
des Congrès

Hôpital

Hôtel Meridien

Stade  
Olympique

Centre Culturel  
Français

Marché du  
Plateau

Cathédrale

Tour  
Mabemba

Port

Ambassade  
de France

Marché  
Total

Case De Gaulle

BACONGO

fleuve Congo

Pont du Djoué
